# Supplementary material
Source: Royal Society of Chemistry journal article supplement (doi:10.1039/d5rp00441a)
Supplement: d5rp00441a1.pdf [file d5rp00441a1.pdf]

## Supplementary Information

### Interview questions

*Questions in italics were used only when further clarification was needed.*

#### Part 1

1. What do you think of, what comes to mind when you hear the word "analysis"? *What do you think the word "analysis" mean? What other words spontaneously come to mind when you hear the word "analysis"? What do you think is possible for us to analyze?*
2. What kinds of analysis do you know? *Can you think of any adjectives that can go along with the word analysis?*
3. *(If they have already responded to question 1, we ask them to reconsider or contribute anything more)* What are your thoughts and what comes to mind when you hear the words "chemical analysis"? *What materials can be analyzed by employing chemical analysis? How do we analyze a material? What steps do we follow when we analyze a material?*
4. Imagine we have five closed containers in front of us, containing one of the materials listed below: anesthetic, white wine, white vinegar, perfume and plastic film. However, we do not know which one is in each container. How can we find out which material is in each container?

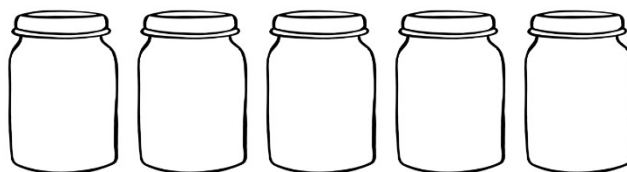

#### Part 2

I will provide you with some information on the materials and their components. In particular, Table A displays some properties of the materials in the containers. Tables B, C and D show some properties of a component of these materials. Table E contains information regarding the structure, interactions with other molecules and spectrum of a component of each of these materials.

*(Only for secondary students)* A few words regarding spectra, which you may not have encountered in school before: There are certain techniques which employ technology to produce "images" known as spectra. More specifically, using nuclear magnetic resonance ( $^{13}\text{C}$ -NMR) spectra, we may determine how carbon atoms are connected in a molecule. Each signal (peak) in the spectrum corresponds to a particular carbon atom in the molecule and is determined by how the carbon atoms interact with others. Carbon atoms with the same neighboring atoms emit the same signal. The signal of carbon atoms connected to other atoms, such as oxygen, is to the left of the signal of carbon atoms which are bonded to hydrogen.

Table F provides more information about chemicals and their relationship to societal problems. Take as much time as you need to study these tables so that you can use them to answer some more questions.<sup>1</sup>

| <b>Table A</b>             |                                    |                                     |                                                   |                                                                                 |                            |
|----------------------------|------------------------------------|-------------------------------------|---------------------------------------------------|---------------------------------------------------------------------------------|----------------------------|
| <b>material</b>            | <b>anesthetic</b>                  | <b>white wine</b>                   | <b>white vinegar</b>                              | <b>perfume</b>                                                                  | <b>plastic film</b>        |
| <i>material properties</i> | tasteless                          | spicy taste                         | acidic taste                                      | bitter taste                                                                    | tasteless                  |
|                            | odourless                          | mild odour                          | less mild odour                                   | strong odour                                                                    | odourless                  |
|                            | colourless                         | pale yellow                         | pale yellow                                       | colourless to pale yellow                                                       | colourless to white        |
|                            | gas                                | liquid                              | liquid                                            | liquid                                                                          | solid                      |
| <i>origin</i>              | isolation from natural gas and oil | alcoholic fermentation of grapes    | acetic fermentation of wine or fruit, e.g. apples | distillation of natural products (e.g., essential oils) or synthetic fragrances | oil by-product, synthetic  |
| <i>function - use</i>      | anesthesia in surgical procedures  | beverage, antioxidant, preservative | food ingredient, preservative                     | cosmetic                                                                        | packaging materials, films |

| <b>Table B</b>  |                   |                   |                      |                |                     |
|-----------------|-------------------|-------------------|----------------------|----------------|---------------------|
| <b>material</b> | <b>anesthetic</b> | <b>white wine</b> | <b>white vinegar</b> | <b>perfume</b> | <b>plastic film</b> |

| <b>component</b>            | <b>ethane</b> | <b>ethanol</b> | <b>ethanoic acid</b> | <b>1-propanol</b> | <b>polyvinyl chloride (PVC)</b>            |
|-----------------------------|---------------|----------------|----------------------|-------------------|--------------------------------------------|
| <i>component properties</i> |               |                |                      |                   |                                            |
| <i>boiling point</i>        | -89 °C        | 78 °C          | 118 °C               | 97 °C             | -<br>breaks down and releases toxic vapors |

<sup>1</sup> Most of the information about materials and compounds was retrieved from the database *PubChem*: <https://pubchem.ncbi.nlm.nih.gov/>

|                     |                                                            |                                                          |                                                                       |                                             |                                                       |
|---------------------|------------------------------------------------------------|----------------------------------------------------------|-----------------------------------------------------------------------|---------------------------------------------|-------------------------------------------------------|
| <i>density</i>      | 0,5 g/cm <sup>3</sup>                                      | 0,8 g/cm <sup>3</sup>                                    | 1,0 g/cm <sup>3</sup>                                                 | 0,8 g/cm <sup>3</sup>                       | 1,4 g/cm <sup>3</sup>                                 |
| <i>solubility</i>   | Very low solubility in water. Soluble in organic solvents. | Very soluble in water. Soluble in many organic solvents. | Soluble in water in any ratio. Soluble in almost any organic solvent. | Soluble in water and some organic solvents. | Insoluble in water, very soluble in organic solvents. |
| <i>acidity (pH)</i> | neutral solution                                           | neutral solution                                         | acidic solution                                                       | neutral solution                            | neutral solution                                      |

|                 |                   |                   |                      |                |                     |
|-----------------|-------------------|-------------------|----------------------|----------------|---------------------|
| <b>Table C</b>  |                   |                   |                      |                |                     |
| <b>material</b> | <b>anesthetic</b> | <b>white wine</b> | <b>white vinegar</b> | <b>perfume</b> | <b>plastic film</b> |

|                           |                                 |                                    |                                              |                                                    |                                                                       |
|---------------------------|---------------------------------|------------------------------------|----------------------------------------------|----------------------------------------------------|-----------------------------------------------------------------------|
| <b>component</b>          | <b>ethane</b>                   | <b>ethanol</b>                     | <b>ethanoic acid</b>                         | <b>1-propanol</b>                                  | <b>polyvinyl chloride (PVC)</b>                                       |
| <i>Molecular formula</i>  | C <sub>2</sub> H <sub>6</sub>   | C <sub>2</sub> H <sub>6</sub> O    | C <sub>2</sub> H <sub>4</sub> O <sub>2</sub> | C <sub>3</sub> H <sub>8</sub> O                    | [C <sub>2</sub> H <sub>3</sub> Cl] <sub>v</sub><br>(v = 500 έως 1500) |
| <i>Structural formula</i> | CH <sub>3</sub> CH <sub>3</sub> | CH <sub>3</sub> CH <sub>2</sub> OH | CH <sub>3</sub> COOH                         | CH <sub>3</sub> CH <sub>2</sub> CH <sub>2</sub> OH | [CH <sub>2</sub> CHCl] <sub>v</sub>                                   |

|                 |                   |                   |                      |                |                     |
|-----------------|-------------------|-------------------|----------------------|----------------|---------------------|
| <b>Table D</b>  |                   |                   |                      |                |                     |
| <b>material</b> | <b>anesthetic</b> | <b>white wine</b> | <b>white vinegar</b> | <b>perfume</b> | <b>plastic film</b> |

|                             |               |                |                      |                   |                                 |
|-----------------------------|---------------|----------------|----------------------|-------------------|---------------------------------|
| <b>component</b>            | <b>ethane</b> | <b>ethanol</b> | <b>ethanoic acid</b> | <b>1-propanol</b> | <b>polyvinyl chloride (PVC)</b> |
| <i>component properties</i> |               |                |                      |                   |                                 |

Add  $KMnO_4/H_2SO_4$  solution

which has a violet color.

If the reaction occurs,

the violet color disappears:

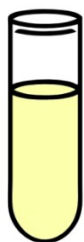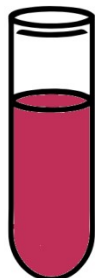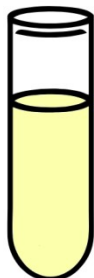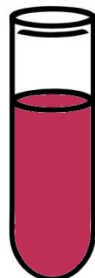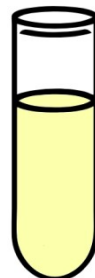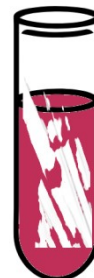

Add  $I_2/NaOH$  solution

If the reaction occurs,

a yellow precipitate is produced:

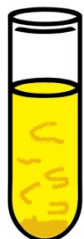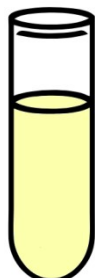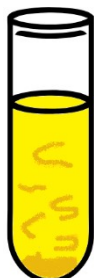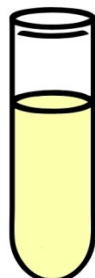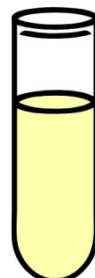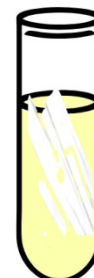

Add solid Na

If the reaction occurs,  
gas is produced:

**Table E**

● oxygen atom O

● carbon atom C

  hydrogen atom H

● chlorine Cl

|                                               |                                                                       |  |  |  |  |  |
|-----------------------------------------------|-----------------------------------------------------------------------|--|--|--|--|--|
| <b>anesthetic</b>                             | $\begin{array}{c} \text{H}_3\text{C} \\   \\ \text{CH}_3 \end{array}$ |  |  |  |  |  |
| <b>ethane</b>                                 |                                                                       |  |  |  |  |  |
| <i><sup>13</sup>C-NMR spectrum for ethane</i> |                                                                       |  |  |  |  |  |

|                                                |                                                                                         |  |  |  |  |
|------------------------------------------------|-----------------------------------------------------------------------------------------|--|--|--|--|
| <b>white wine</b>                              | $\begin{array}{c} \text{H}_2 \\   \\ \text{H}_3\text{C}-\text{C}-\text{OH} \end{array}$ |  |  |  |  |
| <b>ethanol</b>                                 |                                                                                         |  |  |  |  |
| <i><sup>13</sup>C-NMR spectrum for ethanol</i> |                                                                                         |  |  |  |  |

|              |                                                                                        |  |  |  |  |
|--------------|----------------------------------------------------------------------------------------|--|--|--|--|
| <b>white</b> | $\begin{array}{c} \text{O} \\    \\ \text{H}_3\text{C}-\text{C}-\text{OH} \end{array}$ |  |  |  |  |
|              |                                                                                        |  |  |  |  |
|              |                                                                                        |  |  |  |  |

|                                                      |  |  |
|------------------------------------------------------|--|--|
| <b>vinegar</b>                                       |  |  |
| <b>ethanoic acid</b>                                 |  |  |
| <i><sup>13</sup>C-NMR spectrum for ethanoic acid</i> |  |  |

|                                                   |                                                                                                  |  |
|---------------------------------------------------|--------------------------------------------------------------------------------------------------|--|
| <b>perfume</b>                                    | $\begin{array}{c} \text{H}_3\text{C}-\text{C}-\text{C}-\text{OH} \\   \\ \text{H}_2 \end{array}$ |  |
| <b>1-propanol</b>                                 |                                                                                                  |  |
| <i><sup>13</sup>C-NMR spectrum for 1-propanol</i> |                                                                                                  |  |

|                                                           |                                                                                                                                          |  |
|-----------------------------------------------------------|------------------------------------------------------------------------------------------------------------------------------------------|--|
| <b>plastic film</b>                                       | $\left[ \begin{array}{cc} \text{H} & \text{Cl} \\   &   \\ -\text{C} & -\text{C}- \\   &   \\ \text{H} & \text{H} \end{array} \right]_v$ |  |
| <b>polyvinyl chloride (PVC)</b>                           |                                                                                                                                          |  |
| <i><sup>13</sup>C-NMR spectrum for polyvinyl chloride</i> |                                                                                                                                          |  |

| <b>Table F</b>                      |                |                |                      |                   |                                 |
|-------------------------------------|----------------|----------------|----------------------|-------------------|---------------------------------|
| <b>substance</b>                    |                |                |                      |                   |                                 |
| <i>information about substances</i> | <b>ethane</b>  | <b>ethanol</b> | <b>ethanoic acid</b> | <b>1-propanol</b> | <b>polyvinyl chloride (PVC)</b> |
| <i>located in</i>                   | hospital waste | liquid waste   | liquid waste         | liquid waste      | liquid waste, landfills         |

|                                                                              |                                                              |                                                              |                                                              |                                                              |                                 |
|------------------------------------------------------------------------------|--------------------------------------------------------------|--------------------------------------------------------------|--------------------------------------------------------------|--------------------------------------------------------------|---------------------------------|
| <i>relates to</i>                                                            | number of surgical procedures performed<br>amount of         | alcohol consumption                                          | food consumption                                             | number of cosmetics used                                     | amount of packaging purchased   |
| <i>fields that collaborate on the analysis and interpretation of results</i> | medicine, biology                                            | medicine, biology, nutrition                                 | medicine, biology, nutrition                                 | pharmacy                                                     | physics, environmental sciences |
| <i>frequency of measurements</i>                                             | per week                                                     | per day                                                      | per day                                                      | per day                                                      | per month                       |
| <i>where and how analysis is conducted</i>                                   | in the field with a portable instrument or in the laboratory | in the field with a portable instrument or in the laboratory | in the field with a portable instrument or in the laboratory | in the field with a portable instrument or in the laboratory | in the laboratory               |

**5. a)** If we could see inside a material, what would we see? *What is it made of? Give me an example or think about the specific materials you are given. How would you describe these components? Are these components made of something else?*

What do you think makes a material what it is? What makes one component different from another?

What changes in materials when a chemical reaction occurs and what remains the same?

How do you think spectra are produced?

**b)** Since we cannot see inside a material, how did you think in order to answer the question regarding what it is made of? From all the information you were provided, on what ground did you choose the specific information you used to provide your answers? *Why did you use this piece of information (and not some other)? If you used information from table xx, how would your answer change?*

Some of the information refers to certain properties. What do you think causes these properties? How are the properties related to the type of material?

**c)** Why do you think it is important to determine the components of these materials? *If you used information from table xx, how would your answer change?*

**6. a)** Describe a way you would suggest finding out which material is placed in each container. Tables B, C, D, and E give you some information about the main component of each of these materials. Since we cannot see inside each material, how can we find out what it is made of? *For example, what does wine contain? What procedure would we follow to identify this main component in each material? Can you think of any other way we could use to determine the existence of this component in the material?*

**b)** How did you think in order to find out which material exists in each container? How did you think of the way in which you will determine which component exists in a specific material? *What helped you?*

From all the information we provided you with, how did you choose which to use? *Why did you use this piece of information (and not some other)? If you had used information from table xx, how would your answer change?*

**c)** Why is the procedure you proposed important? *Why is it important to be able to find the components of materials using this specific procedure? Does the procedure you suggested have any advantages, disadvantages or utility compared to another procedure that one of your classmates might suggest or compared to using another table? If you used information from table xx, how would your answer change?*

**7.** Do you have a different perspective or additional comments on what chemical analysis is?

**8.** Many people argue that with the advancement of technology and the many new analytical methods which are based on it (complex instruments, computers, etc.), the classical (older) methods that do not involve the use of instruments (e.g., study of physical properties and chemical reactions, etc.) are no longer necessary and do not need to be taught in schools or universities. What are your thoughts about this? What is your opinion?
